# Supplementary material for: New conjugated poly(pyridinium salt) derivative: AIE characteristics, the interaction with DNA and selective fluorescence enhancement induced by dsDNA
Source: Royal Society of Chemistry journal article supplement (doi:10.1039/c5ra22653h), 2015-01-01
Supplement: c5ra22653h1.pdf [file c5ra22653h1.pdf]

# Supporting Information

## **New conjugated poly(pyridinium salt) derivative: AIE characteristics, the interaction with DNA and selective fluorescence enhancement induced by dsDNA**

Ying Chang, Lu Jin, Jingjing Duan, Qiang Zhang, Jing Wang and Yan Lu\*

Tianjin Key Laboratory for Photoelectric Materials and Devices, School of Materials Science & Engineering, Tianjin University of Technology, Tianjin, 300384, China. E-mail: [luyan@tjut.edu.cn](mailto:luyan@tjut.edu.cn)

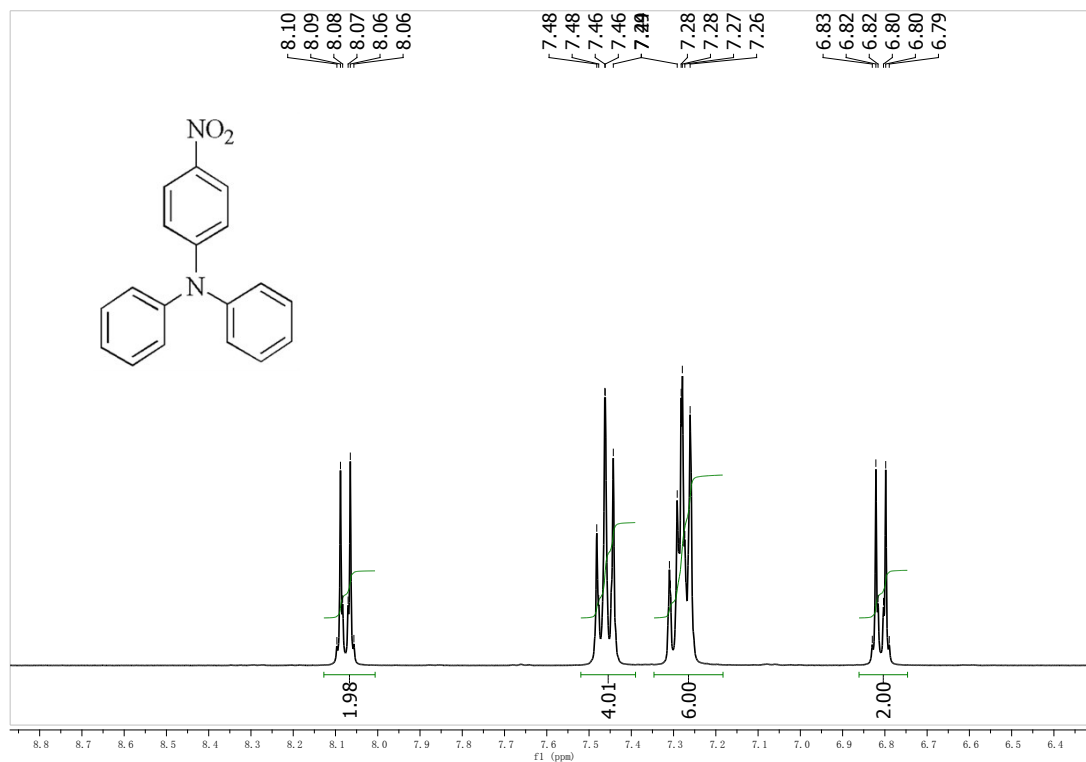

**Fig. S1:** <sup>1</sup>H NMR of compound 1.

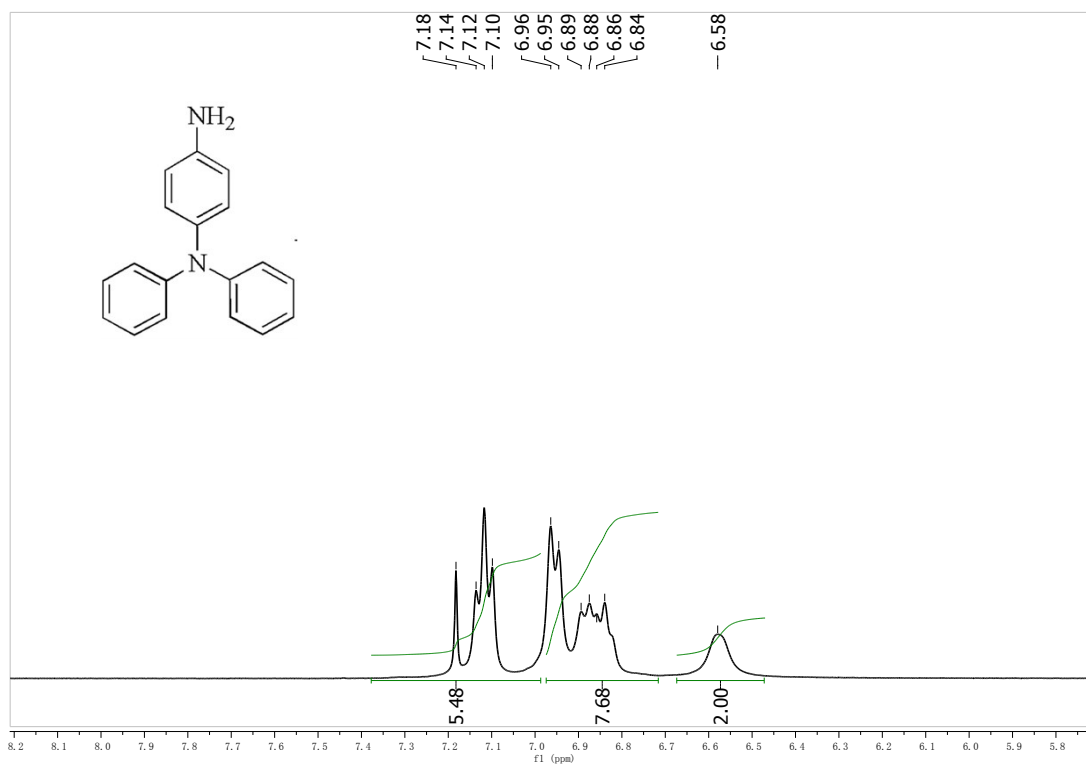

**Fig. S2:** <sup>1</sup>H NMR of compound 2.

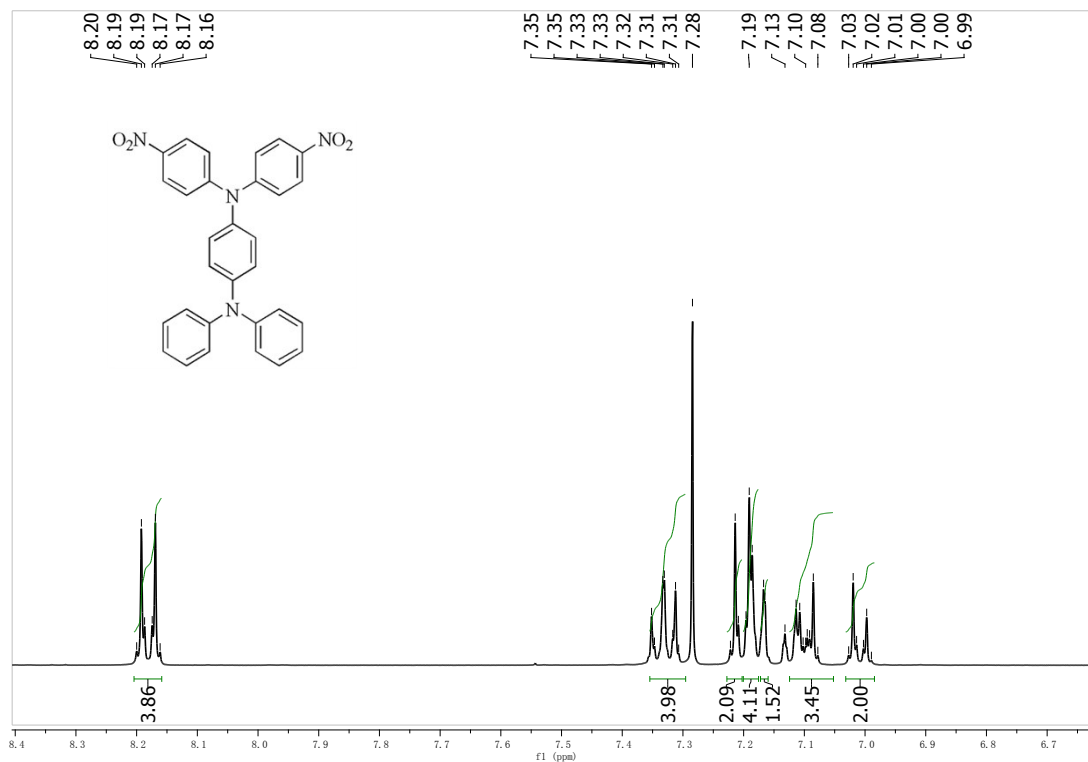

Fig. S3: <sup>1</sup>H NMR of compound 3.

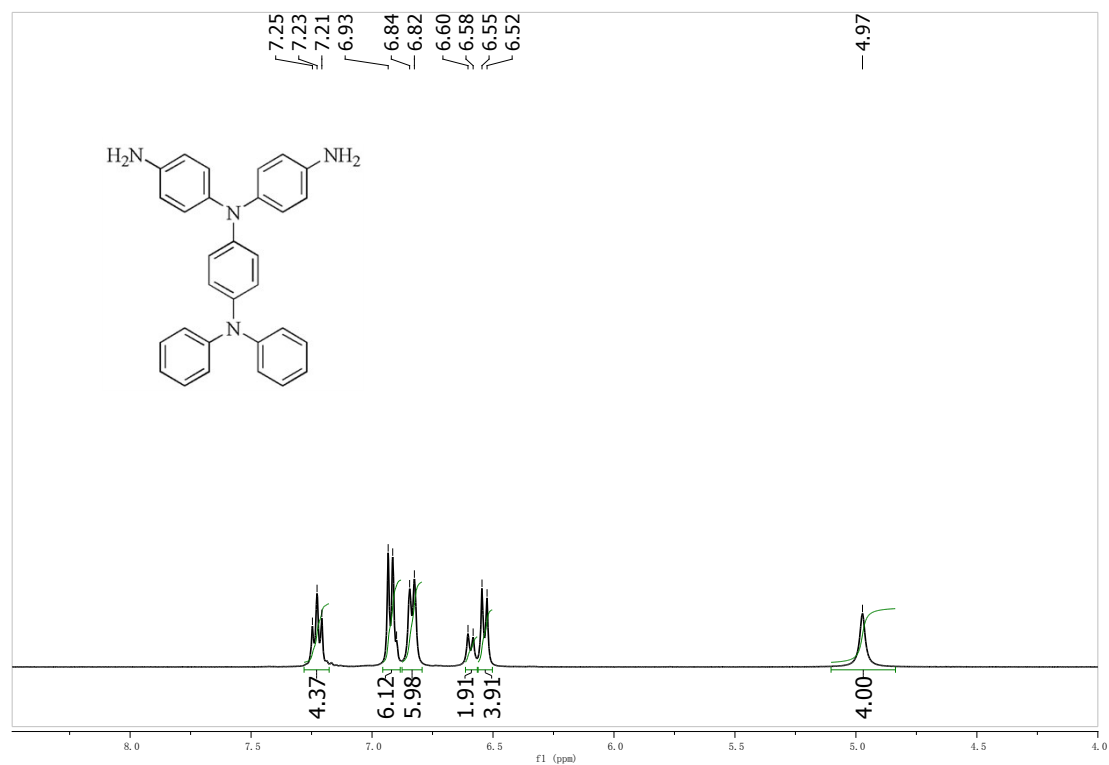

Fig. S4: <sup>1</sup>H NMR of compound 4.

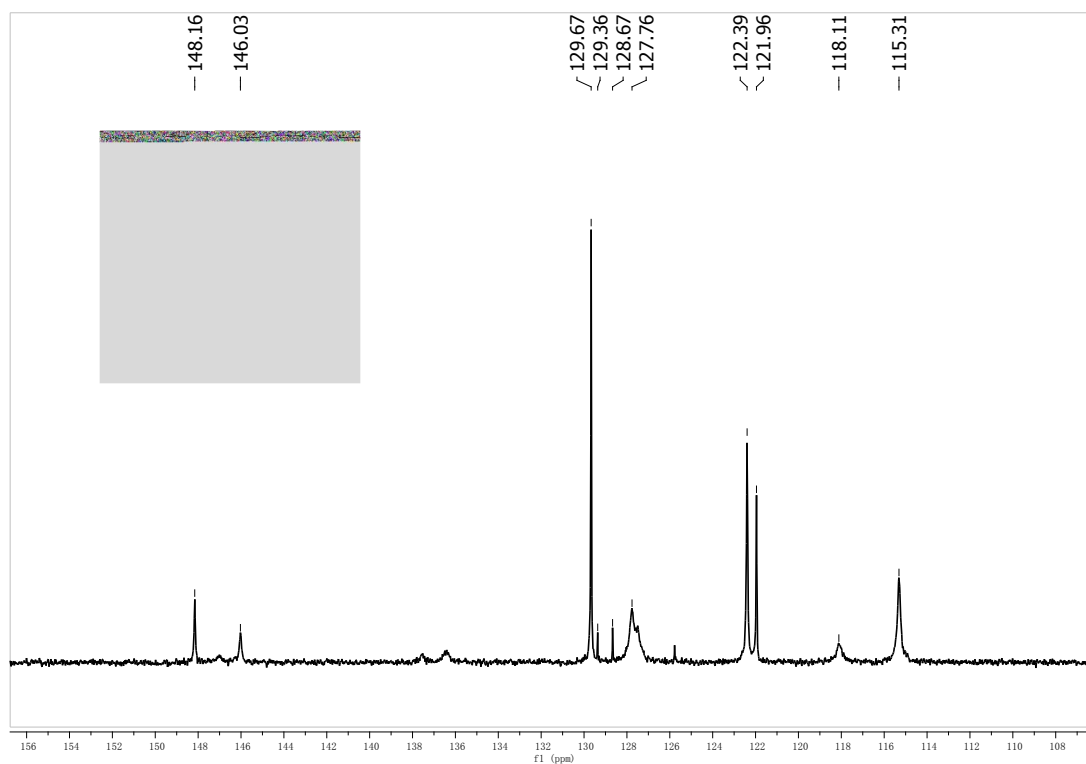

Fig. S5:  $^{13}\text{C}$  NMR of compound 4.

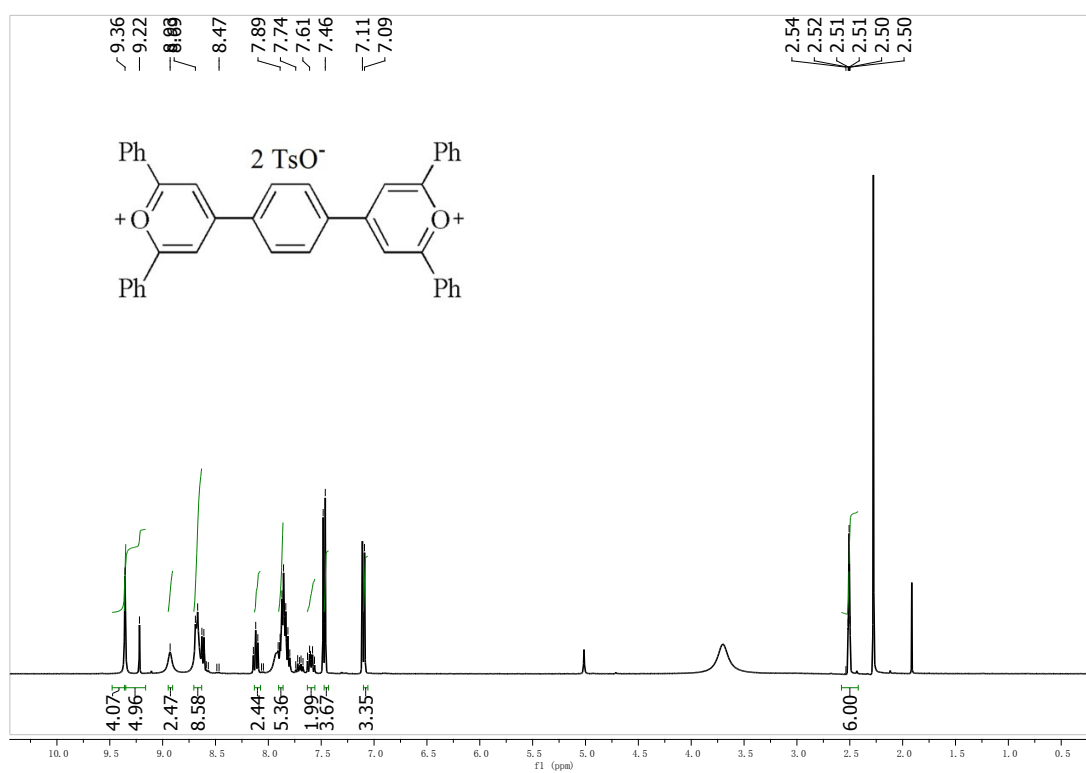

Fig. S6:  $^1\text{H}$  NMR of compound 5.

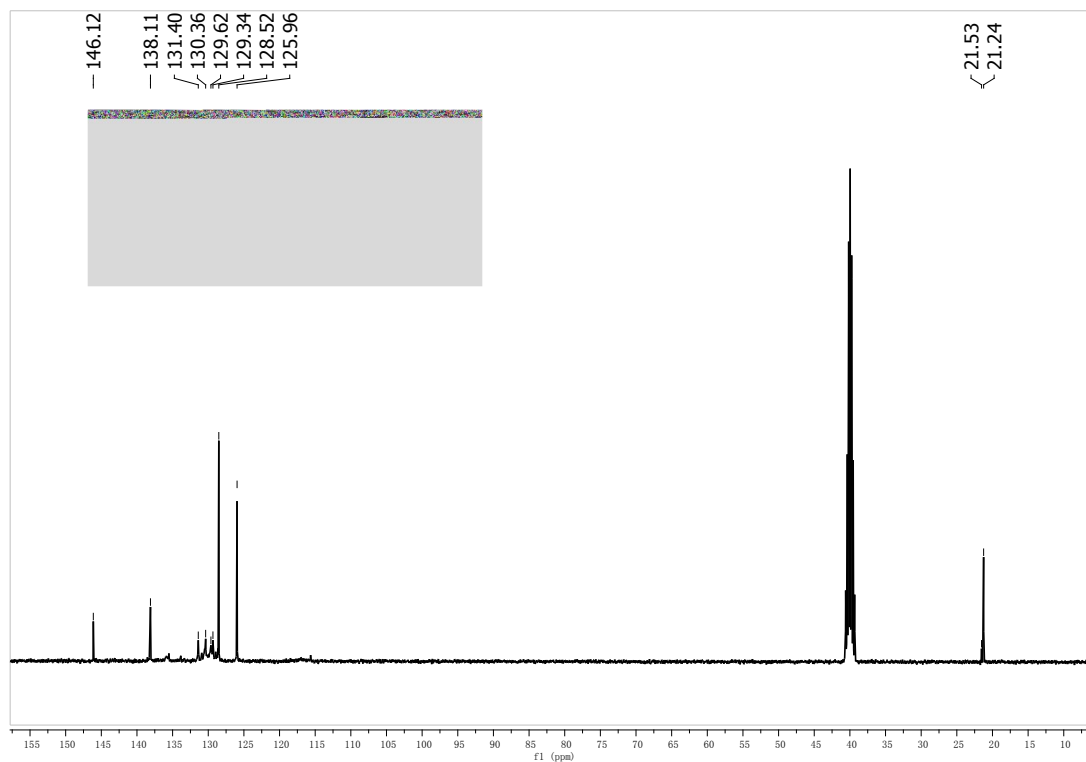

Fig. S7:  $^{13}\text{C}$  NMR of compound 5.

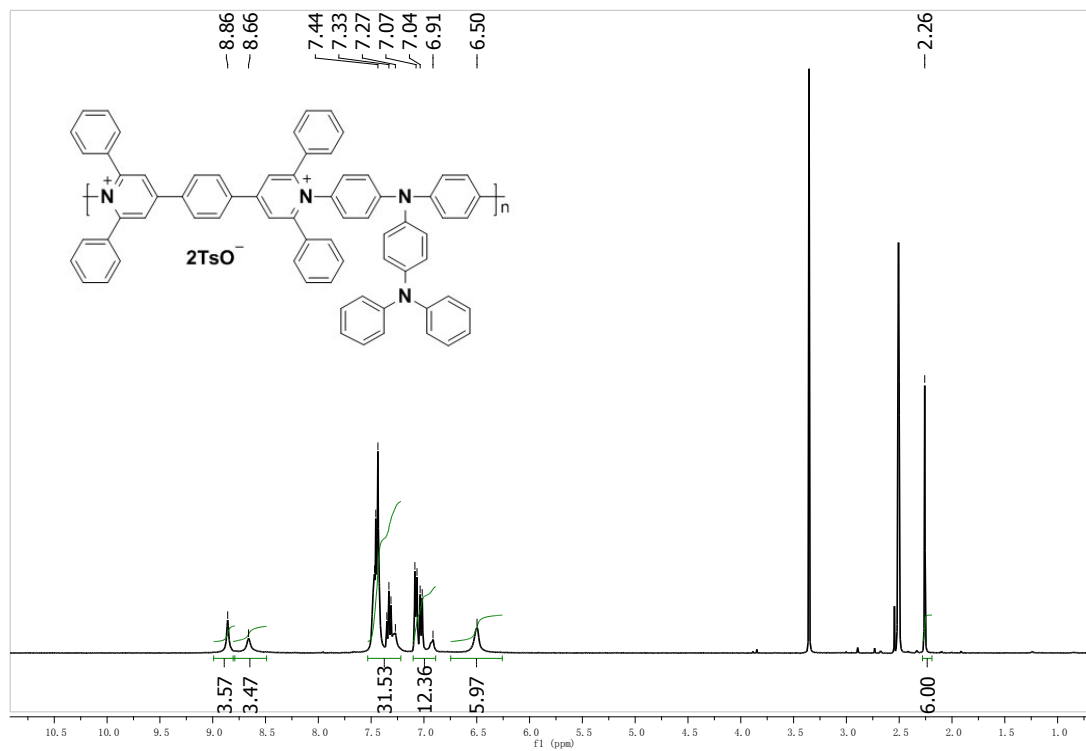

Fig. S8:  $^1\text{H}$  NMR of polymer L.

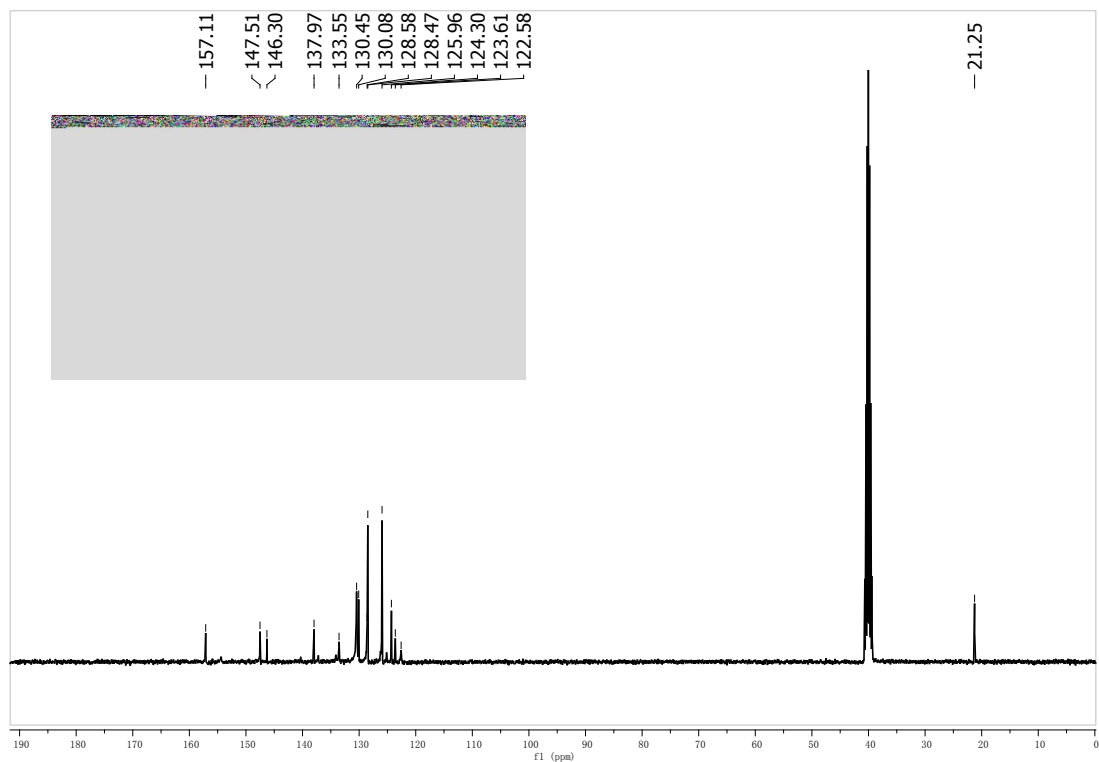

**Fig. S9:**  $^{13}\text{C}$  NMR of polymer L.

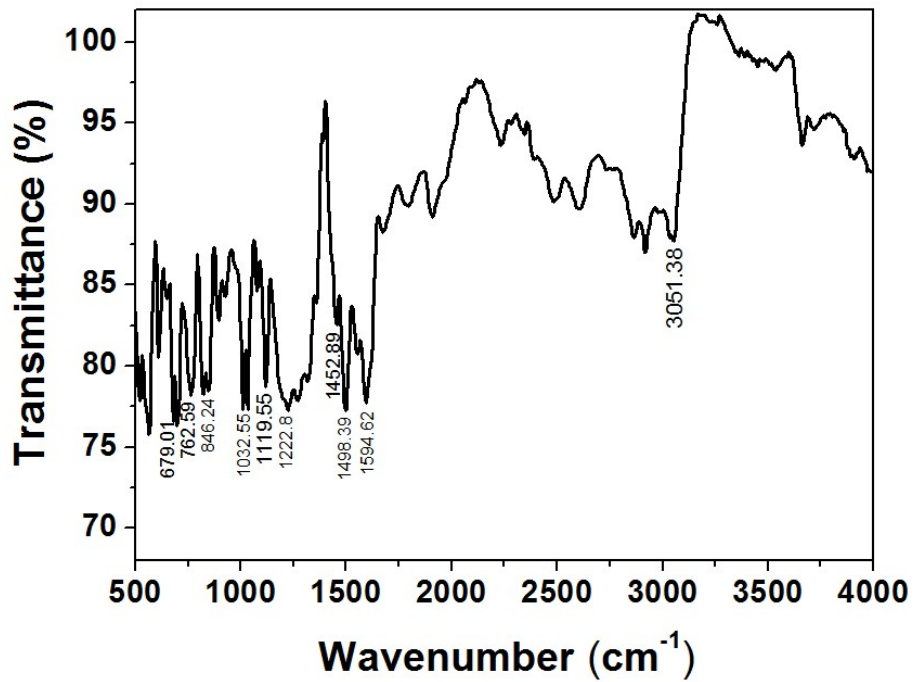

**Fig. S10:** FT-IR of polymer L.

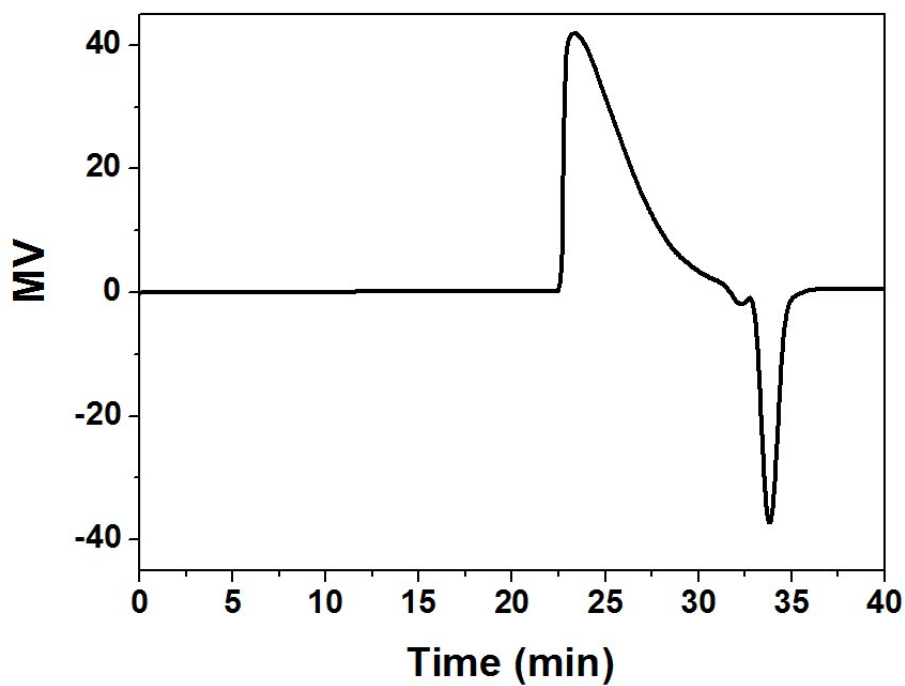

Fig. S11: GPC curve of polymer L.

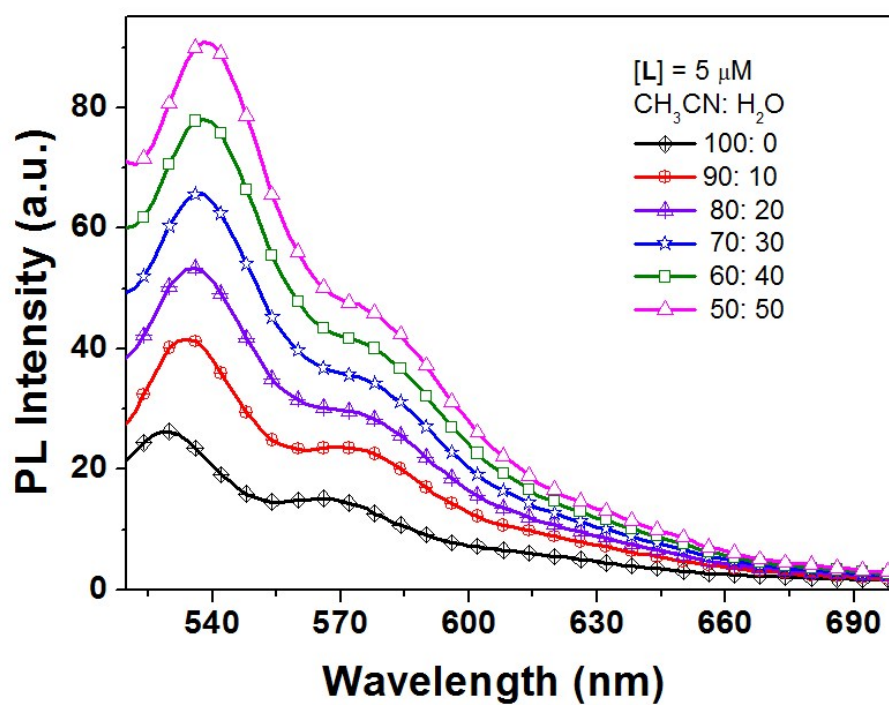

Fig. S12: Photoluminescent emission spectra of L (5uM) in CH<sub>3</sub>CN/water with different ratios (v/v %; excited at 430 nm).

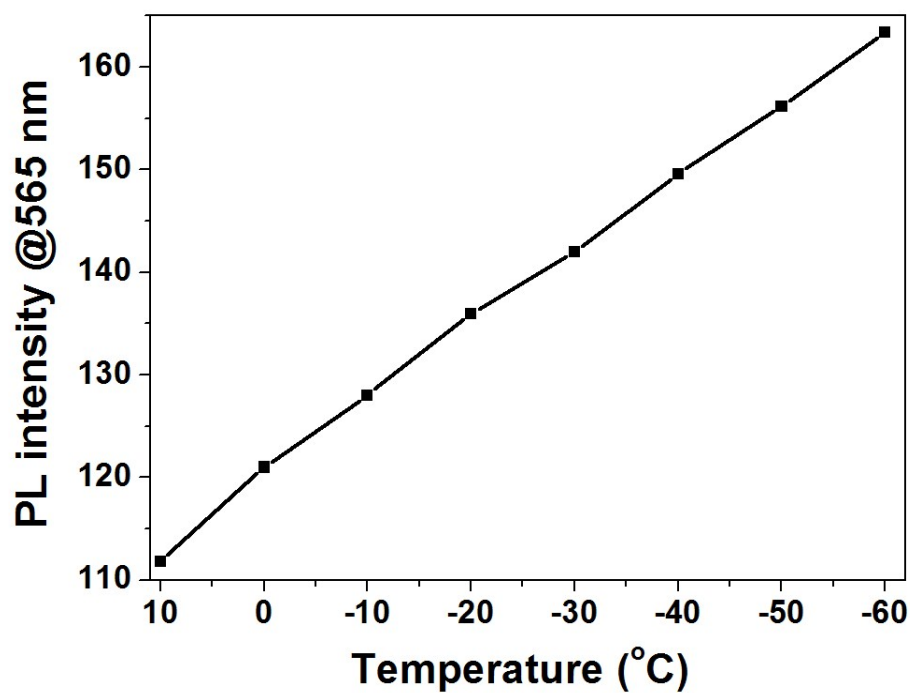

**Fig. 13:** Effect of temperature on PL intensity of **L** in DMF. [**L**] = 5  $\mu$ M.

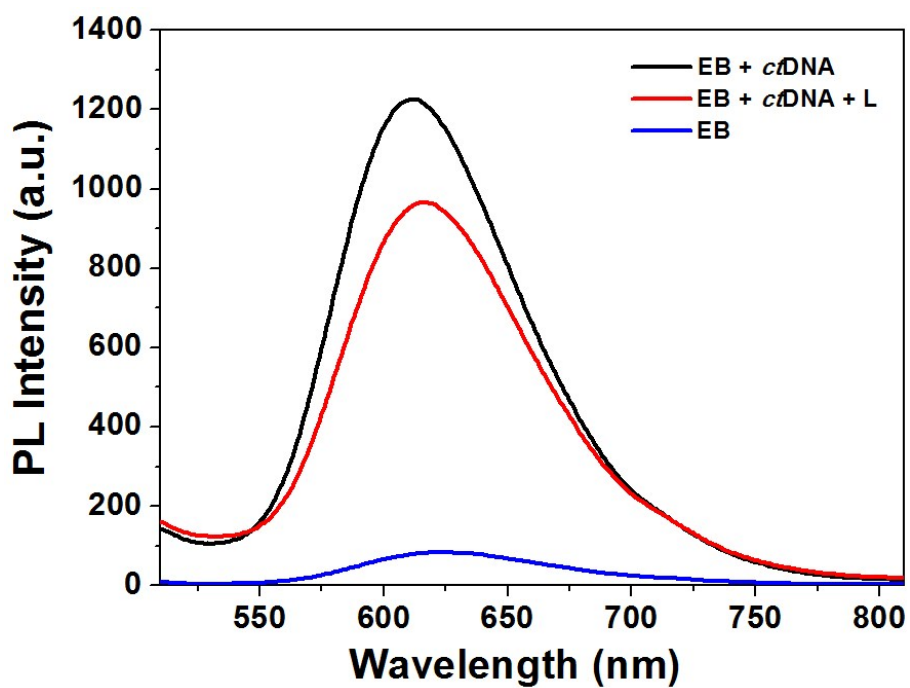

**Fig. 14:** Fluorescent spectra of EB, EB and 10 equiv of *ctDNA*, and EB, 10 equiv *ctDNA* and 10 equiv of **L** in  $\text{CH}_3\text{CN-H}_2\text{O}$  (v/v 1:1).  $\lambda_{\text{ex}} = 430$  nm. [**EB**] = 5  $\mu$ M.



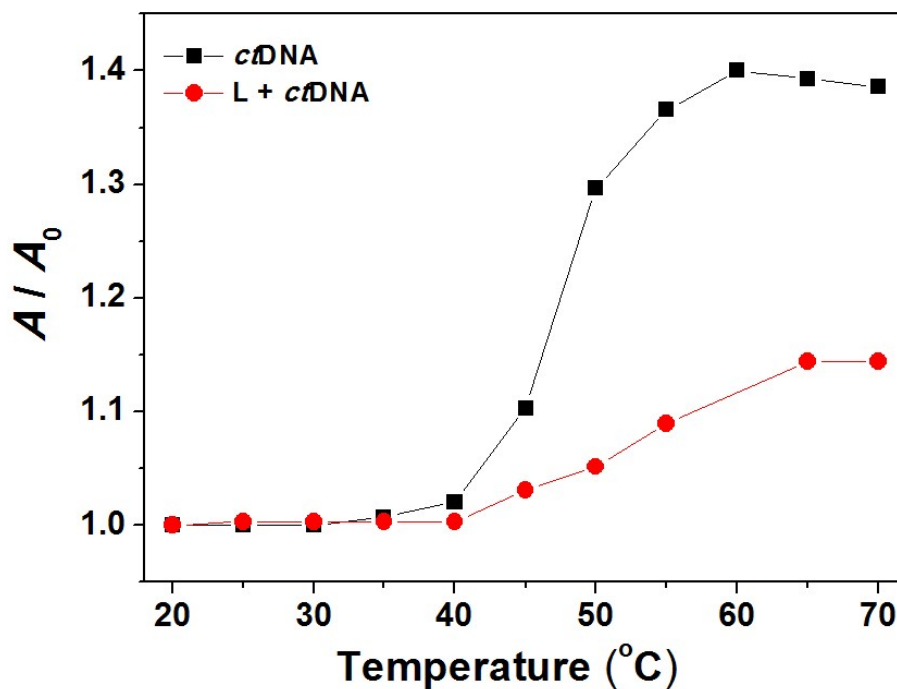

**Fig. S15:** *ctDNA* (25  $\mu\text{M}$ ) melting curves at 260 nm in the absence and presence of **L** (5  $\mu\text{M}$ ) in  $\text{CH}_3\text{CN-H}_2\text{O}$  (v/v 1:1).  $A_0$  and  $A$  denote the initial absorbance and the recorded absorbance at different temperatures, respectively.

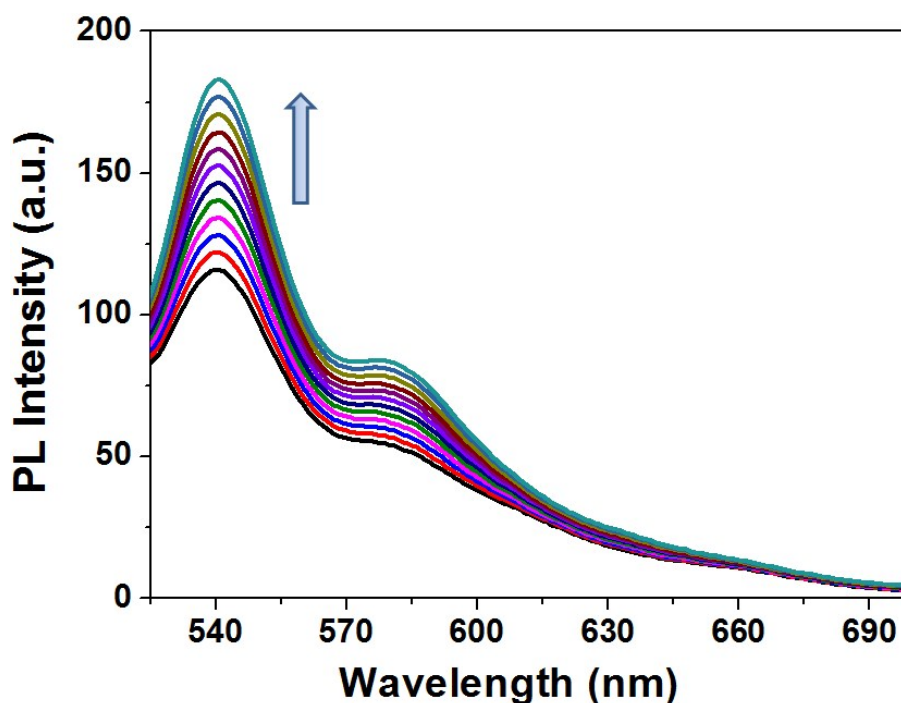

**Fig. S16:** Fluorescent titration spectra of **L** (5  $\mu\text{M}$ ) in  $\text{CH}_3\text{CN-H}_2\text{O}$  (v/v 1:1) in the presence of  $\text{ssDNA}_1$  at different concentrations ranging from 0 to 25  $\mu\text{M}$  ( $\lambda_{\text{ex}} = 430$  nm).
